# Supplementary material for: Hedgehog Signaling Promotes the Proliferation and Subsequent Hair Cell Formation of Progenitor Cells in the Neonatal Mouse Cochlea
Source: PubMed Central journal article supplement (PMC5742997; doi:10.3389/fnmol.2017.00426), 2017-12-21
Supplement: Table_1.pdf [file Table_1.pdf]

Table 1

PCR primer sequences used in these experiments

| Gene   | Forward sequence           | Reverse sequence          |
|--------|----------------------------|---------------------------|
| Actb   | 5'-tctttgcagctccttcgttg-3' | 5'-tccttctgaccattcccac-3' |
| Gli1   | tctccgaccctccacag          | agagatccttcagtgacgt       |
| Gli2   | actctcacctccatcagcac       | ctcagcctcagtcctgacct      |
| Gli3   | tttccctgccttccatcct        | attacgggtggtgggagatcc     |
| Hhip   | tcccgagaaagcaagtcaga       | gccactcatgacctcctg        |
| Ptch1  | atggccgcattgatccctat       | tcttctgtcctcacgtctgt      |
| Wif1   | tacgagttcctgtctctgcg       | ctgctaccccgtcttgttg       |
| Sfrp4  | gtctatgaccgtggagtttg       | ttgctcaggtatggtgccag      |
| Mfng   | agtcacctgtctgtcctg         | gccacatagacatcacggg       |
| Nhlh1  | ctctacgctgtccctctcac       | tccccaccctccctttag        |
| Dixdc1 | ctccatcatcccagactgg        | ggtcgtcctgttcatcct        |
| Mki67  | caactactggaccctggacc       | tccgaagctctgcatcatca      |
| Spp1   | gcttggttatggactgagg        | cccttccgttggtgtcctg       |
| Fgf11  | actttgccagaaacagctcc       | ttggtgacgatgcctttgag      |
| Foxd3  | acctggtcttagttccgttga      | cttggtggcgtttctcctc       |
